# Supplementary material for: Extra centrosomes induce PIDD1‐mediated inflammation and immunosurveillance
Source: PubMed Central journal article supplement — EMBO J. 2023 Aug 2;42(20):e113510. doi: 10.15252/embj.2023113510 (PMC10577638; doi:10.15252/embj.2023113510), 2023-08-02
Supplement: EMBJ-42-e113510-s008.pdf [file EMBJ-42-e113510-s008.pdf]

## Expanded View Figures

**Figure EV1. Aurora kinase inhibition regulates transcriptional pathways that promote inflammation and immune recognition.**

Primary MEF were treated with DMSO or Aurora kinase inhibitor (ZM, 2  $\mu$ M) for 72 h, followed by RNA isolation and 3' mRNA-sequencing.

- A TRRUST analysis of significant DEGs in ZM vs. DMSO treated cells displaying transcription factors predicted to participate in their regulation. Adjusted  $P \leq 0.05$  and cut-off values  $\log_2 FC \geq 1$  or  $\log_2 FC \leq -1$ .
- B Gene set enrichment analysis (GSEA) analysis of transcripts differentially regulated between ZM and DMSO treatment.
- C Curated heatmap for significant DEGs involved in the GO-term "immune system process" (GO: 0002376) that are enriched in ZM vs. DMSO treated MEF. Adjusted  $P \leq 0.05$  and cut-off values  $\log_2 FC \geq 1$  or  $\log_2 FC \leq -1$ .
- D qRT-PCR analysis of selected pro-inflammatory cytokines and chemokines induced in ZM-treated MEF, plotted as fold-change expression relative to untreated cells. *Hprt1*,  *$\beta$ -actin* and *Gapdh* were used as house-keeping gene expression controls.  $n = 3$  biological replicates; data represent mean values  $\pm$  SEM. The statistical significance was determined using two-tailed t-test;  $P \leq 0.1$  (\*),  $P \leq 0.01$  (\*\*),  $P \leq 0.001$  (\*\*\*),  $P \leq 0.0001$  (\*\*\*\*).

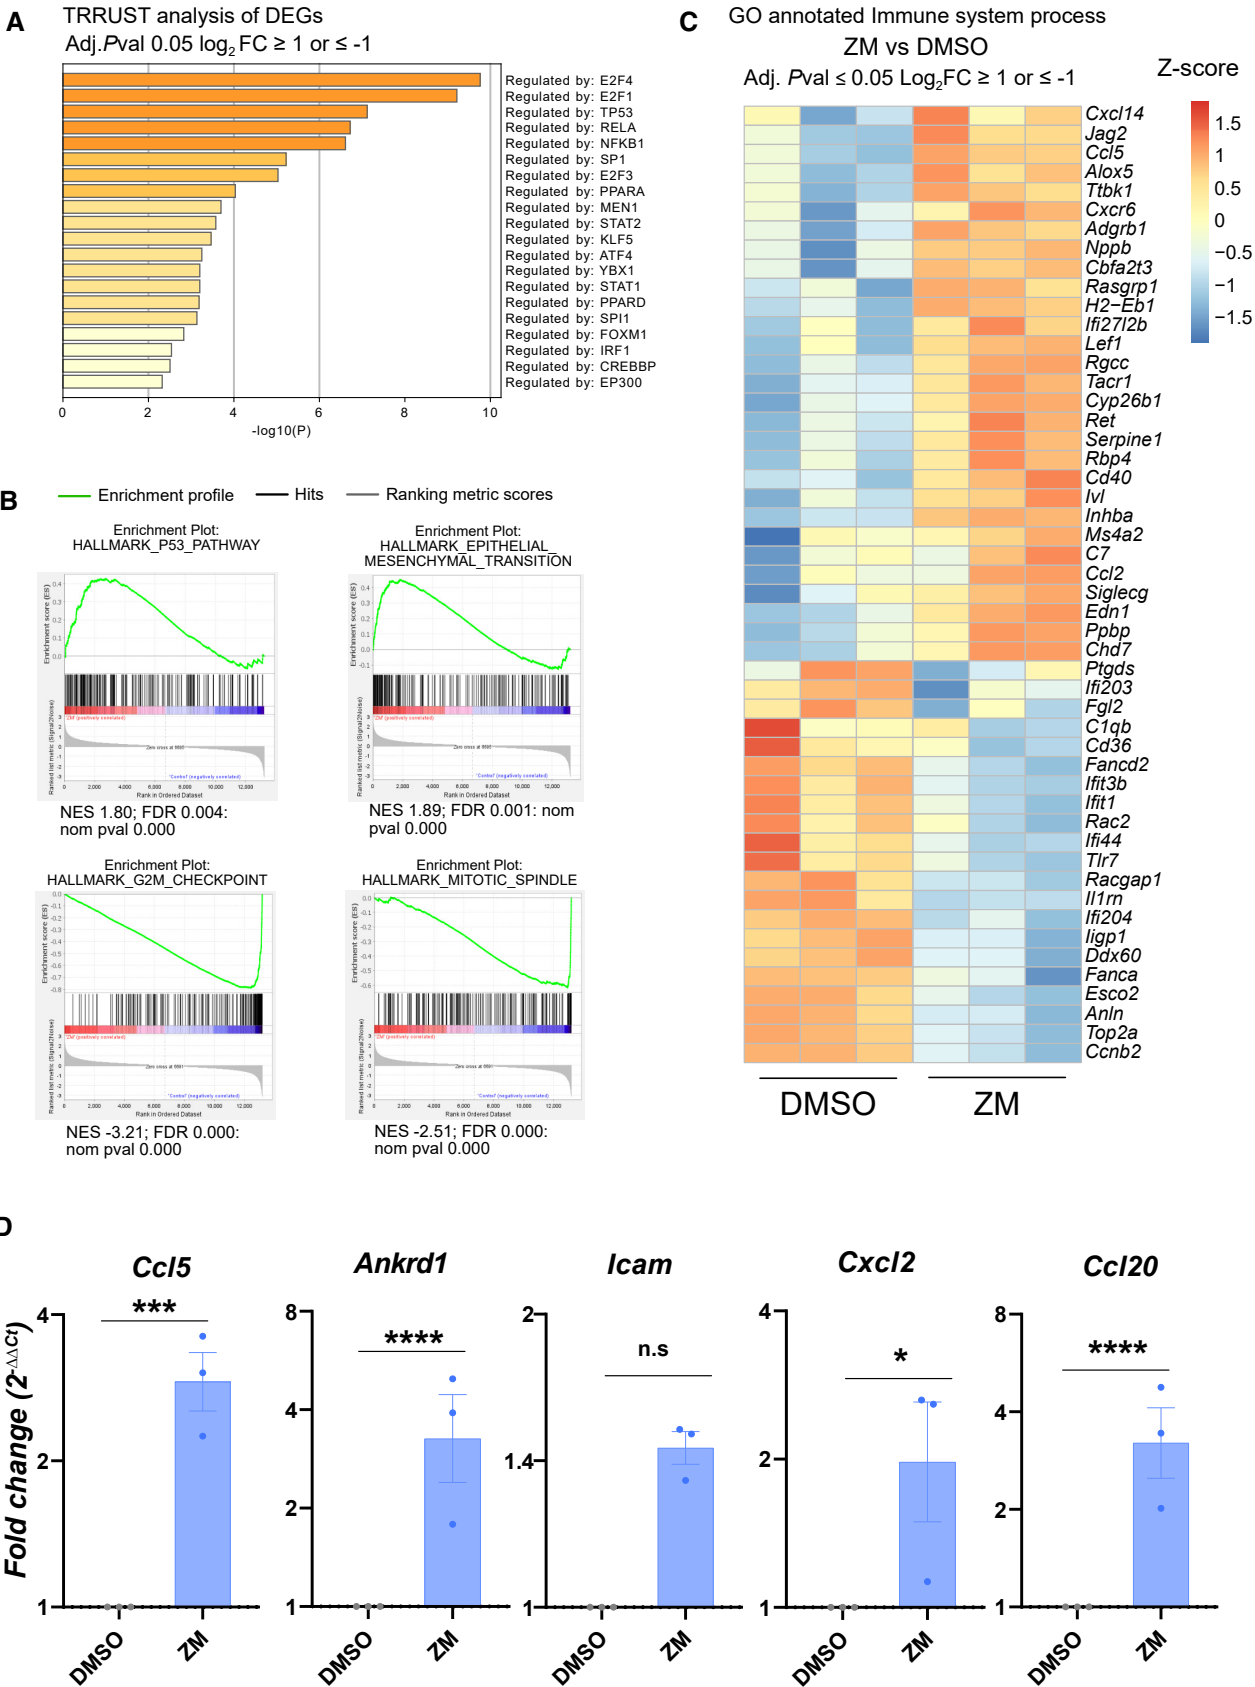

Figure EV1.

**Figure EV2. Cytokinesis failure induces p65 nuclear translocation and NF- $\kappa$ B activation via PIDD1.**

- A Flow cytometric DNA content analysis of single-thymidine synchronized A549 cells, released in DMSO or ZM.
- B Quantification of the percentage of polyploid cells of samples shown in (A). Red dashed line indicates the beginning of mitotic exit in DMSO control cells.
- C Nuclear translocation of p65/RELA was quantified over time and is represented as percentage of cells displaying nuclear p65 signal ( $n \geq 50$  cells per condition). Bars represent means  $\pm$  SEM of two technical replicates.
- D Representative immunofluorescence images of synchronized A549 cells released in ZM and analyzed at different time points by IF. Cells were incubated with TNF (50 ng/ml) for 10 min, as a positive control. Scale bars: 10  $\mu$ m.
- E Flow cytometric analysis of DNA content in RPE1 cells of the indicated genotypes after induction of cytokinesis failure with ZM (2  $\mu$ M) or DHCB (4  $\mu$ M) compared to DMSO. Two independent experiments were performed.
- F, G (F) Western blot analysis confirming lack of PIDD1 expression and (G) impaired MDM2 processing in RPE1 cells lacking *PIDD1* after induction of cytokinesis failure using ZM (2  $\mu$ M) for 48 h.
- H–J (H) Luciferase reporter assay of NF- $\kappa$ B activity in U2OS single cell clone lacking PIDD1 or (I) A549 single cell clones generated with two different guide RNAs targeting *PIDD1* or (J) lacking caspase-2.  $n \geq 3$  independent biological experiments, mean  $\pm$  SEM.
- K, L (K) Live-cell imaging analysis of NF- $\kappa$ B EGFP-reporter activity in CRISPR-edited polyclonal PIDD1-competent or –deficient A549 <sup>$\kappa$ B</sup> cells or (L) RPE1 cells treated with TNF (20 ng/ml).  $n \geq 3$  independent experiments; bars represent mean values  $\pm$  SEM.

Data information: The statistical significance was determined using two-way ANOVA;  $P \leq 0.01$  (\*\*),  $P \leq 0.001$  (\*\*\*),  $P \leq 0.0001$  (\*\*\*\*).

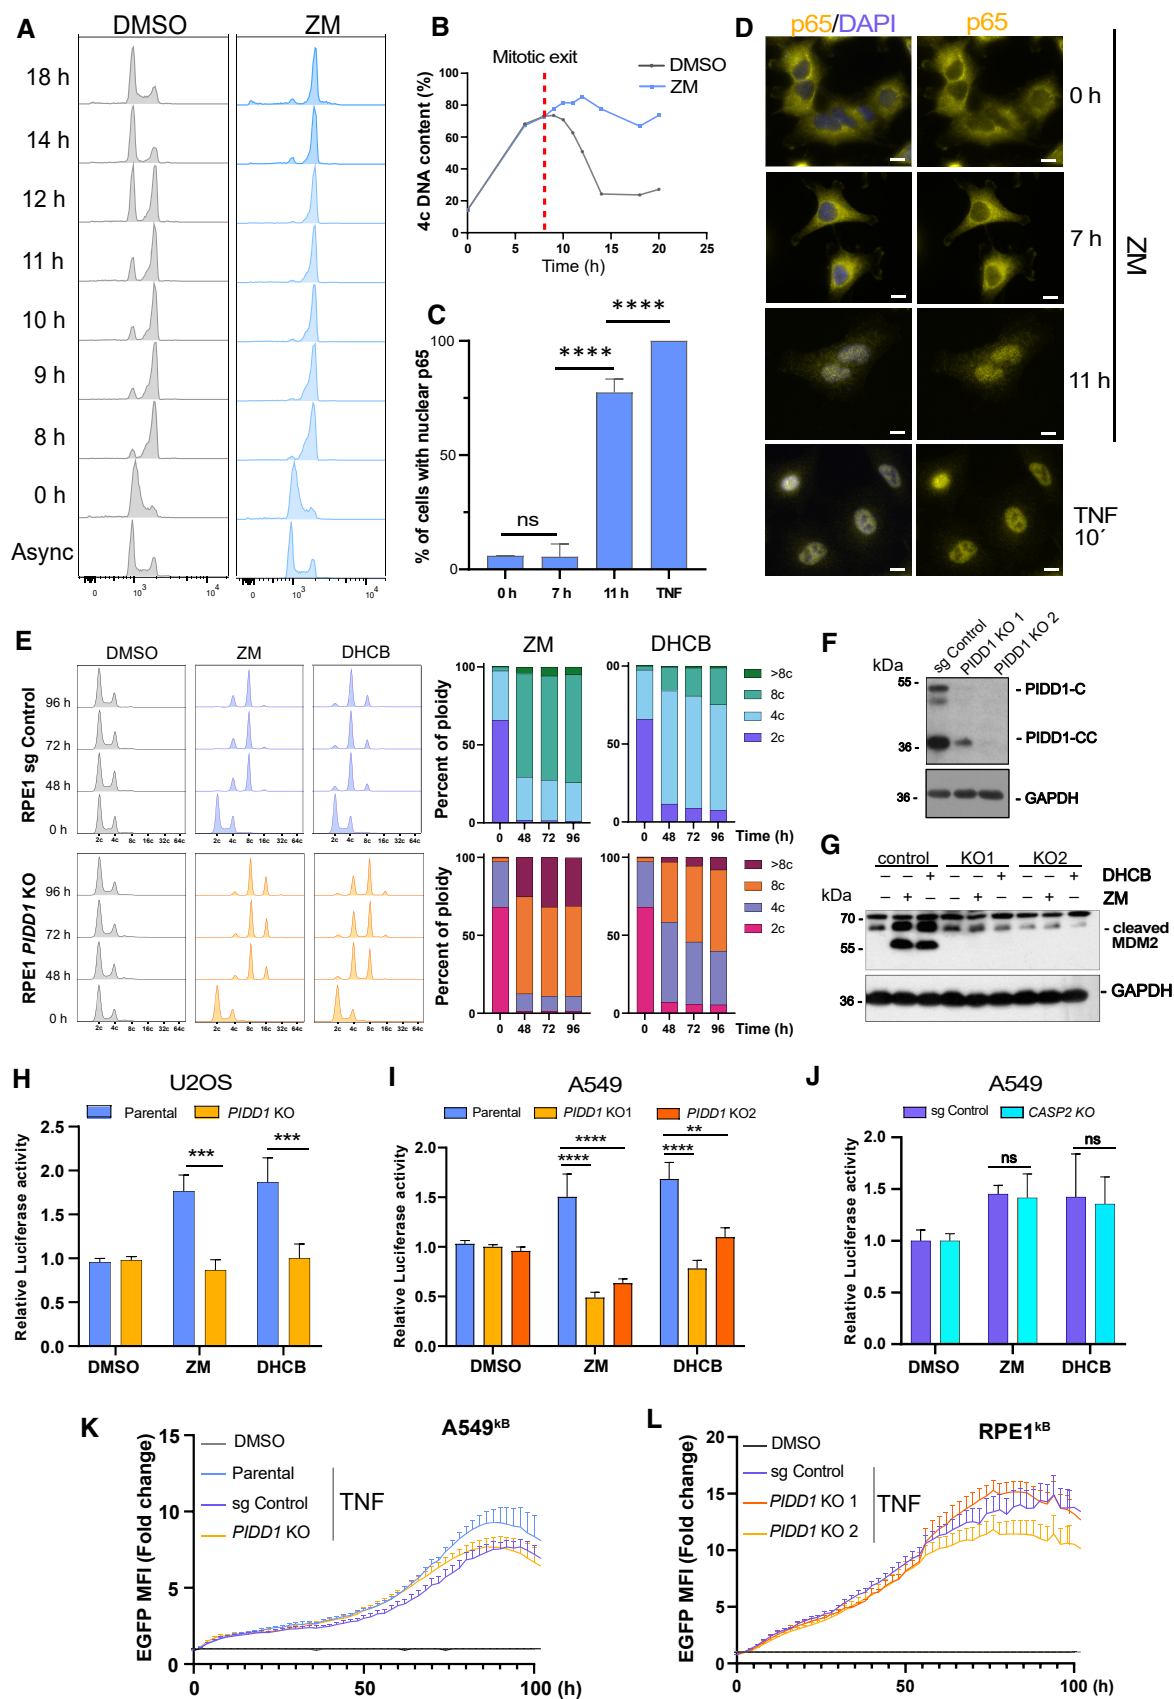

Figure EV2.

**Figure EV3. Assessment of impact of DNA-damage and cGAS/STING signaling on NF- $\kappa$ B activation induced by extra centrosomes.**

- A Enumeration of centriole numbers in A549 cells after centrinone pretreatment (24 h) followed by induction of cytokinesis failure using ZM (2  $\mu$ M) for additional 48 h by immunofluorescence imaging and  $\gamma$ -Tubulin staining. A minimum of 50 cells per condition were analyzed in two independent experiments. Data are presented as mean values.
- B, C (B) Immunoblot analysis of PIDD1 pathway competence, monitored by MDM2 processing and assessed in the indicated (C) CRISPR-edited polyclonal U2OS<sup>PLK4</sup> cells after induction of MYC-PLK4 expression using Dox (1  $\mu$ g/ml, 48 h).
- D A549<sup>PLK4</sup> reporter cells lacking or expressing PIDD1 were treated for the indicated times with ZM or Dox and analyzed for MDM2 processing by western blot analysis.
- E Centrosome number was quantified based on  $\gamma$ -Tubulin staining in the indicated genotypes of U2OS cells treated as indicated. A minimum of 50 cells per condition were analyzed in two independent experiments. Data are presented as mean values.
- F DNA damage levels were assessed in U2OS<sup>PLK4</sup> cells exposed to Dox treatment (1  $\mu$ g/ml) for the indicated times. Nuclear  $\gamma$ H2AX levels were determined by immunofluorescence and plotted as mean intensity per nucleus. Etoposide treatment (10  $\mu$ g/ml, 24 h) was used as positive control. Top, representative immunofluorescence images.  $n \geq 200$  cells per condition were analyzed. Data represented as mean values  $\pm$  SEM. The statistical significance was determined using one-way ANOVA;  $P \leq 0.0001$  (\*\*\*\*). Scale bar: 10  $\mu$ m.
- G Representative immunofluorescence images of nuclear  $\gamma$ H2AX foci in A549<sup>PLK4</sup> cells forming upon the indicated treatments. Scale bar: 10  $\mu$ m.
- H Quantification of DNA damage levels in A549<sup>PLK4</sup> cells determined by the number of  $\gamma$ H2AX nuclear foci per cell upon Dox or ZM treatment.  $n \geq 200$  cells per condition,  $n = 3$  independent experiments; mean  $\pm$  SEM. The statistical significance was determined using one-way ANOVA.
- I Immunoblot analysis of STING endogenous protein levels in different cancer cell lines.
- J STING levels were assessed by immunoblot in parental and CRISPR-edited polyclonal STING-deficient A549 derivatives.
- K Life cell imaging analysis of NF- $\kappa$ B EGFP-reporter activity in polyclonal CRISPR-edited STING-competent or -deficient A549<sup>KB</sup> cells after ZM treatment.  $n = 5$  independent experiments. Data represent mean values  $\pm$  SEM.

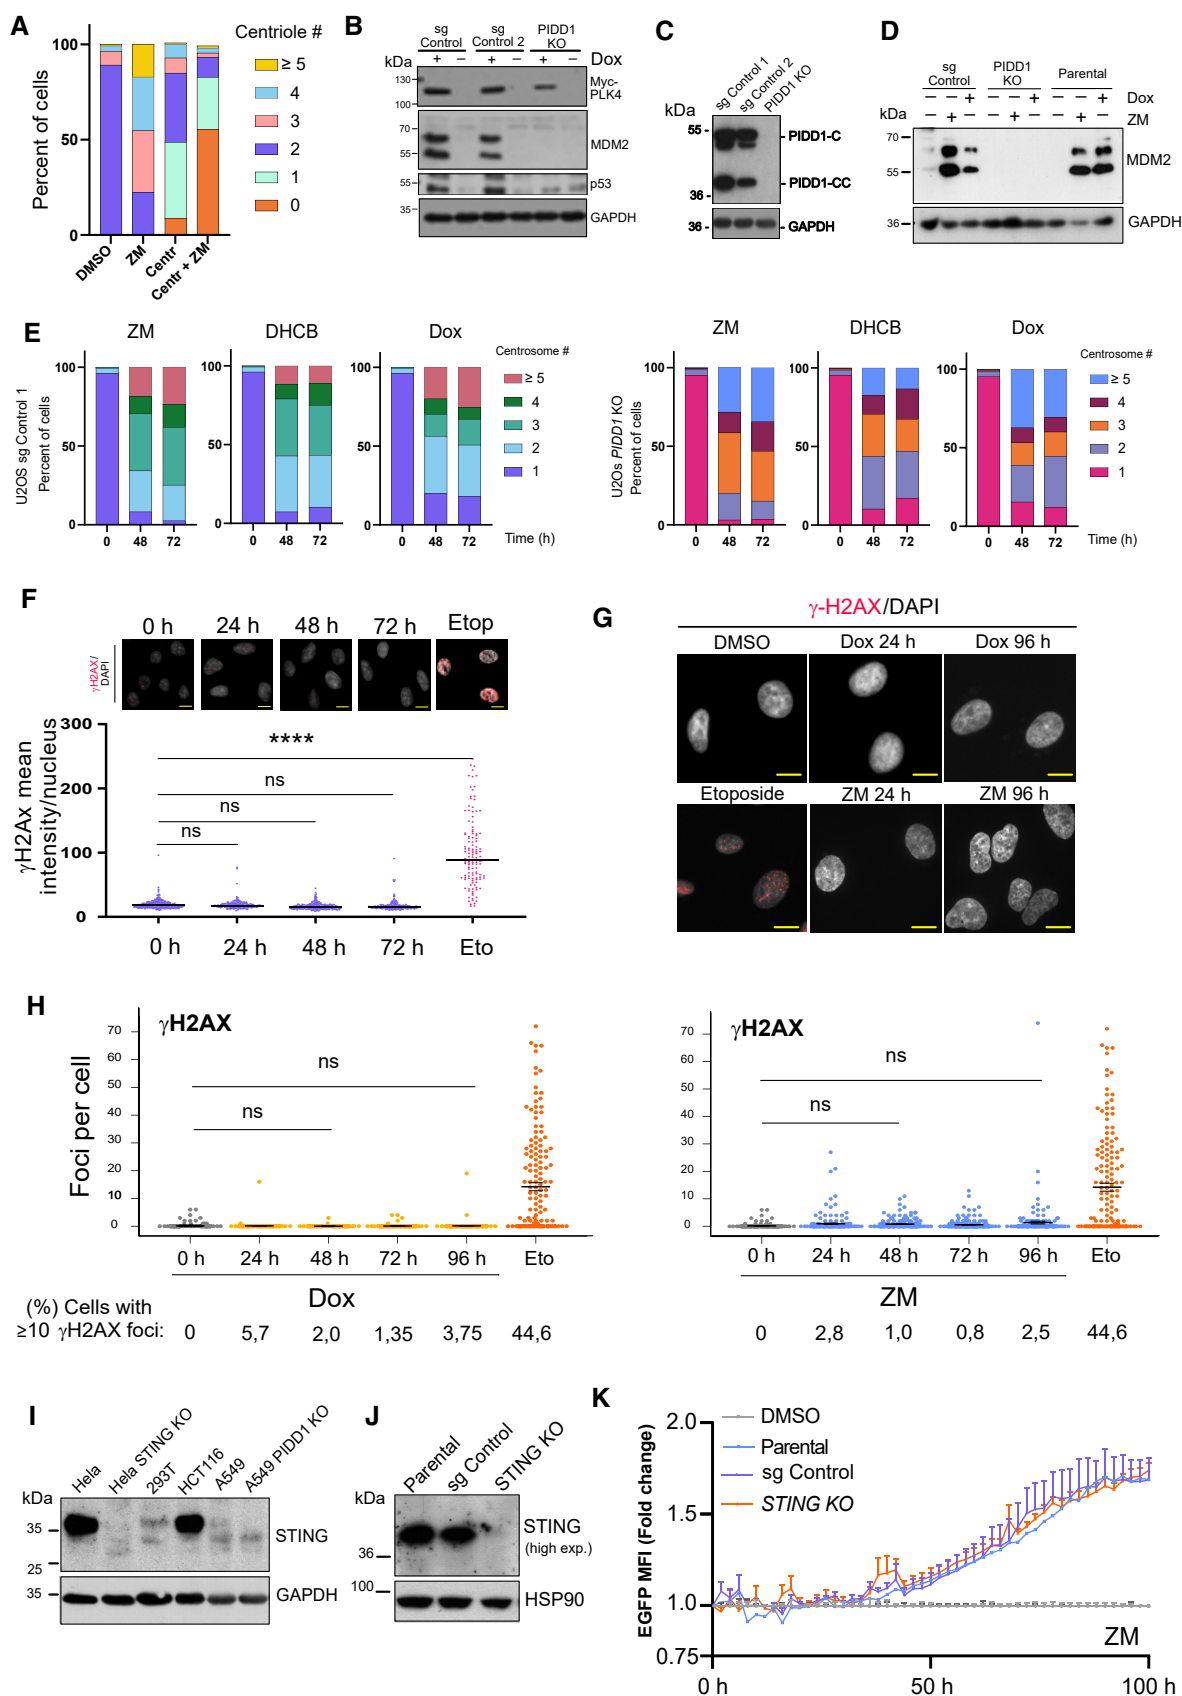

Figure EV3.

**Figure EV4. Extra centrosomes induce sterile inflammation in a PIDD1-dependent manner.**

- A Volcano plot of DEGs in *Pidd1*<sup>-/-</sup> primary MEF induced by ZM vs. DMSO treatment for 72 h. Adjusted *P* value  $\leq 0.01$  and  $\log_2$  FC  $\geq 1$  or  $\log_2$  FC  $\leq -1$ .
- B GO-term analysis for significant DEGs for ZM vs. DMSO stimulated primary *Pidd1*<sup>-/-</sup> MEF. FDR  $\leq 0.05$ , adjusted *P*  $\leq 0.01$  and cut-off values  $\log_2$  FC  $\geq 1$  or  $\log_2$  FC  $\leq -1$ .
- C, D (C) Representative histograms of DNA content analysis in primary MEF after induction of cytokinesis failure with ZM (2  $\mu$ M) for the indicated times, quantified in (D). Two independent experiments were performed.
- E–G (E) Primary MEF derived from TET-PLK4 mice were treated with Dox for 48 h and processed for immunofluorescence detection of extra centrosomes using  $\gamma$ -tubulin, quantified in (F), or RNA extraction for qRT-PCR analyses of NF- $\kappa$ B target genes (G). Scale bars: 10  $\mu$ m.  $\beta$ -actin was used as housekeeping control. *n* = 5 biological replicates; mean  $\pm$  SEM. The statistical significance was determined using two-way ANOVA; *P*  $\leq 0.1$  (\*), *P*  $\leq 0.001$  (\*\*\*), *P*  $\leq 0.0001$  (\*\*\*\*).
- H Flow cytometric analysis of F4/80 and CD11b in BMDM on day 7 after isolation.

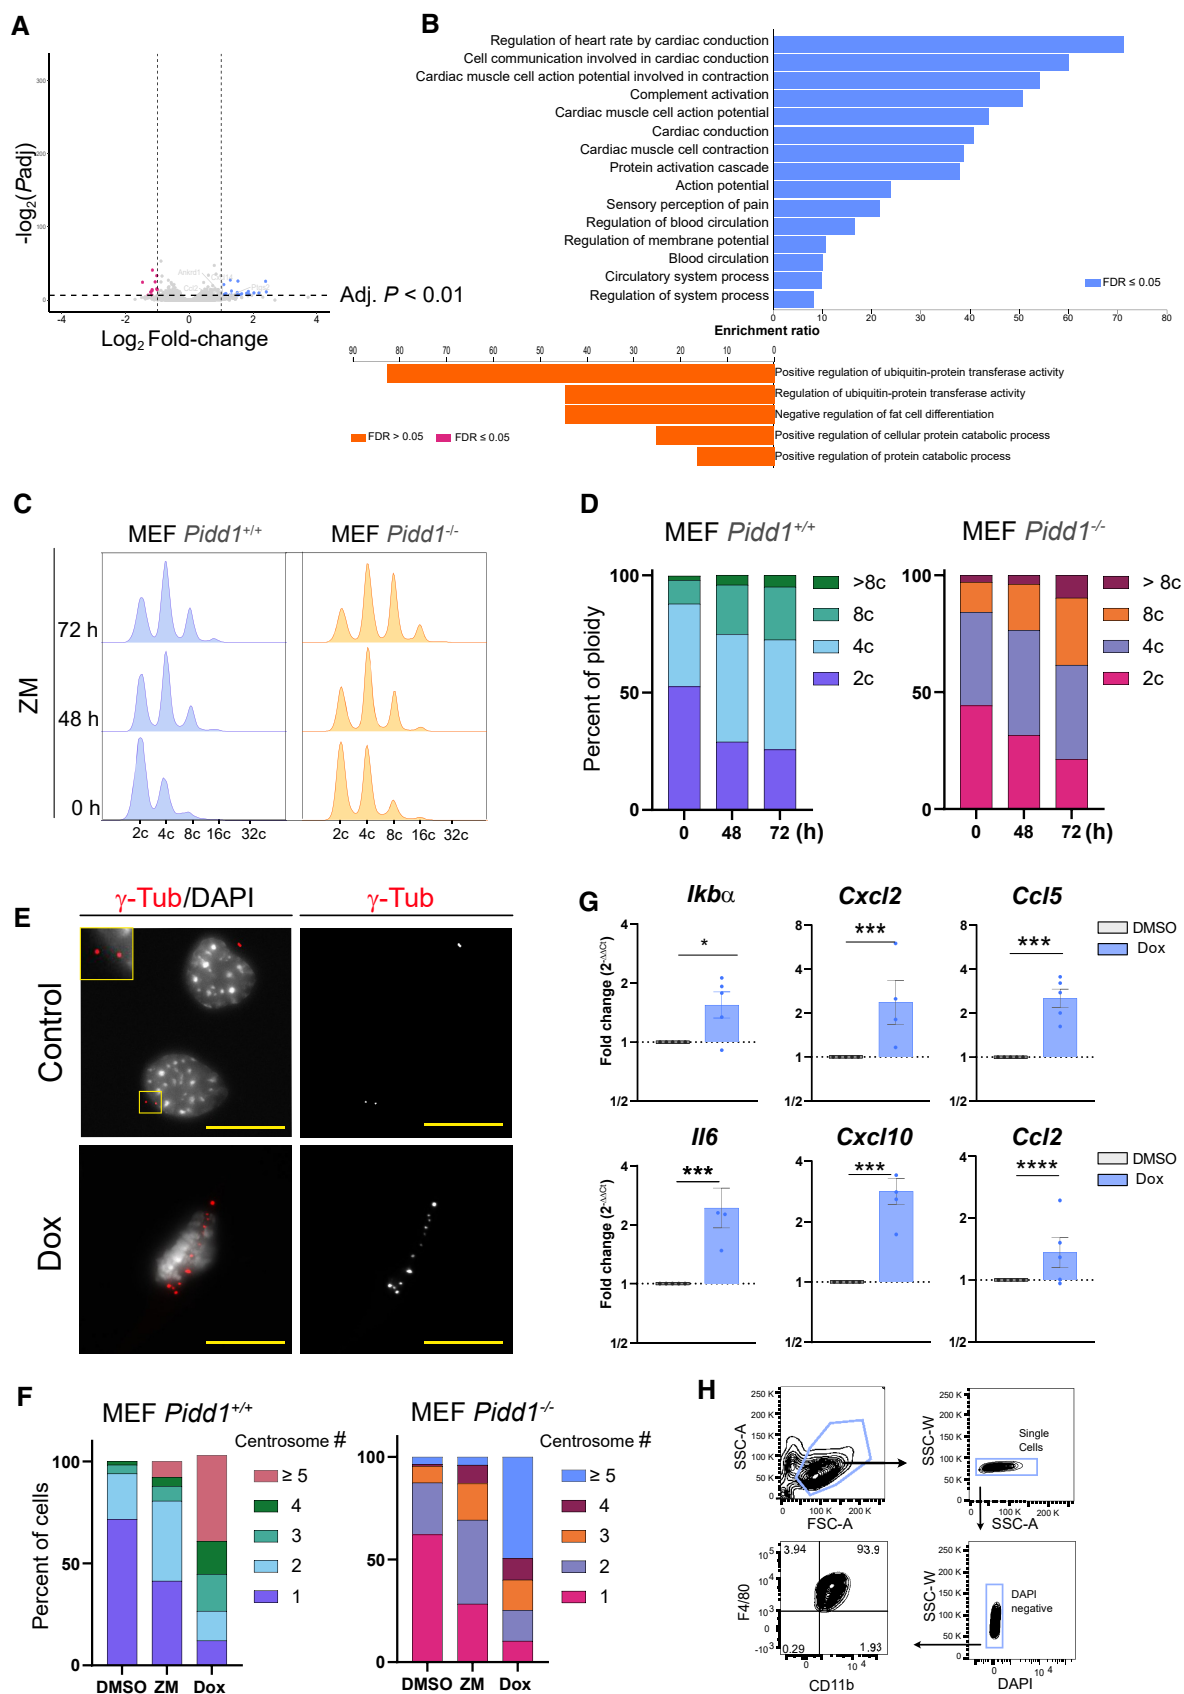

Figure EV4.

**Figure EV5. PIDD1 is necessary to activate NK cells targeting polyploid cells.**

- A Experimental design of NK cell killing assays.
- B Evaluation of centriole counts based on IF analysis and  $\gamma$ -tubulin staining. More than 50 cells were evaluated per condition in two independent experiments. Data are presented as means values.
- C Evaluation of reporter activity in A549 cells of the indicated genotypes proficient or deficient in NF- $\kappa$ B activation, due to loss of RELA/B or overexpression of the I $\kappa$ B $\alpha$  super-repressor (SR) after treatment with ZM, the canonical NF- $\kappa$ B pathway agonist, TNF or the non-canonical NF- $\kappa$ B pathway agonist TWEAK.  $n = 3$  independent experiments; mean  $\pm$  SEM.
- D Confluence curves from A549<sup>EGFP</sup> derivatives of the indicated genotypes, pretreated with DHCB (4  $\mu$ M) to induce cytokinesis defects and co-cultured with NK-92 cells.  $n \geq 3$  independent experiments; mean  $\pm$  SEM.
- E Conditioned medium from ZM pretreated A549 cells of the indicated genotypes was applied to human monocyte-derived macrophages for 24 h followed by RNA isolation and qRT-qPCR analysis of macrophage activation markers. Expression values are plotted as the fold-change relative to macrophages stimulated with conditioned medium from untreated A549 cells. *HPRT1* expression was used for normalization. Bars represent mean  $\pm$  SEM of  $n \geq 4$  independent experiments. The statistical significance was determined using two-way ANOVA;  $P \leq 0.1$  (\*),  $P \leq 0.01$  (\*\*),  $P \leq 0.001$  (\*\*\*).
- F Proliferation curves of different A549<sup>EGFP</sup> derivatives, pretreated with ZM (2  $\mu$ M) or DHCB (4  $\mu$ M), for 72 h in the absence of NK cells. Time zero is defined as the moment of the drug wash out. Live-cell imaging of target cells without NK cells was performed in parallel to killing experiments using the same conditions as described in the methods section.  $n = 5$  independent experiments; mean  $\pm$  SEM.

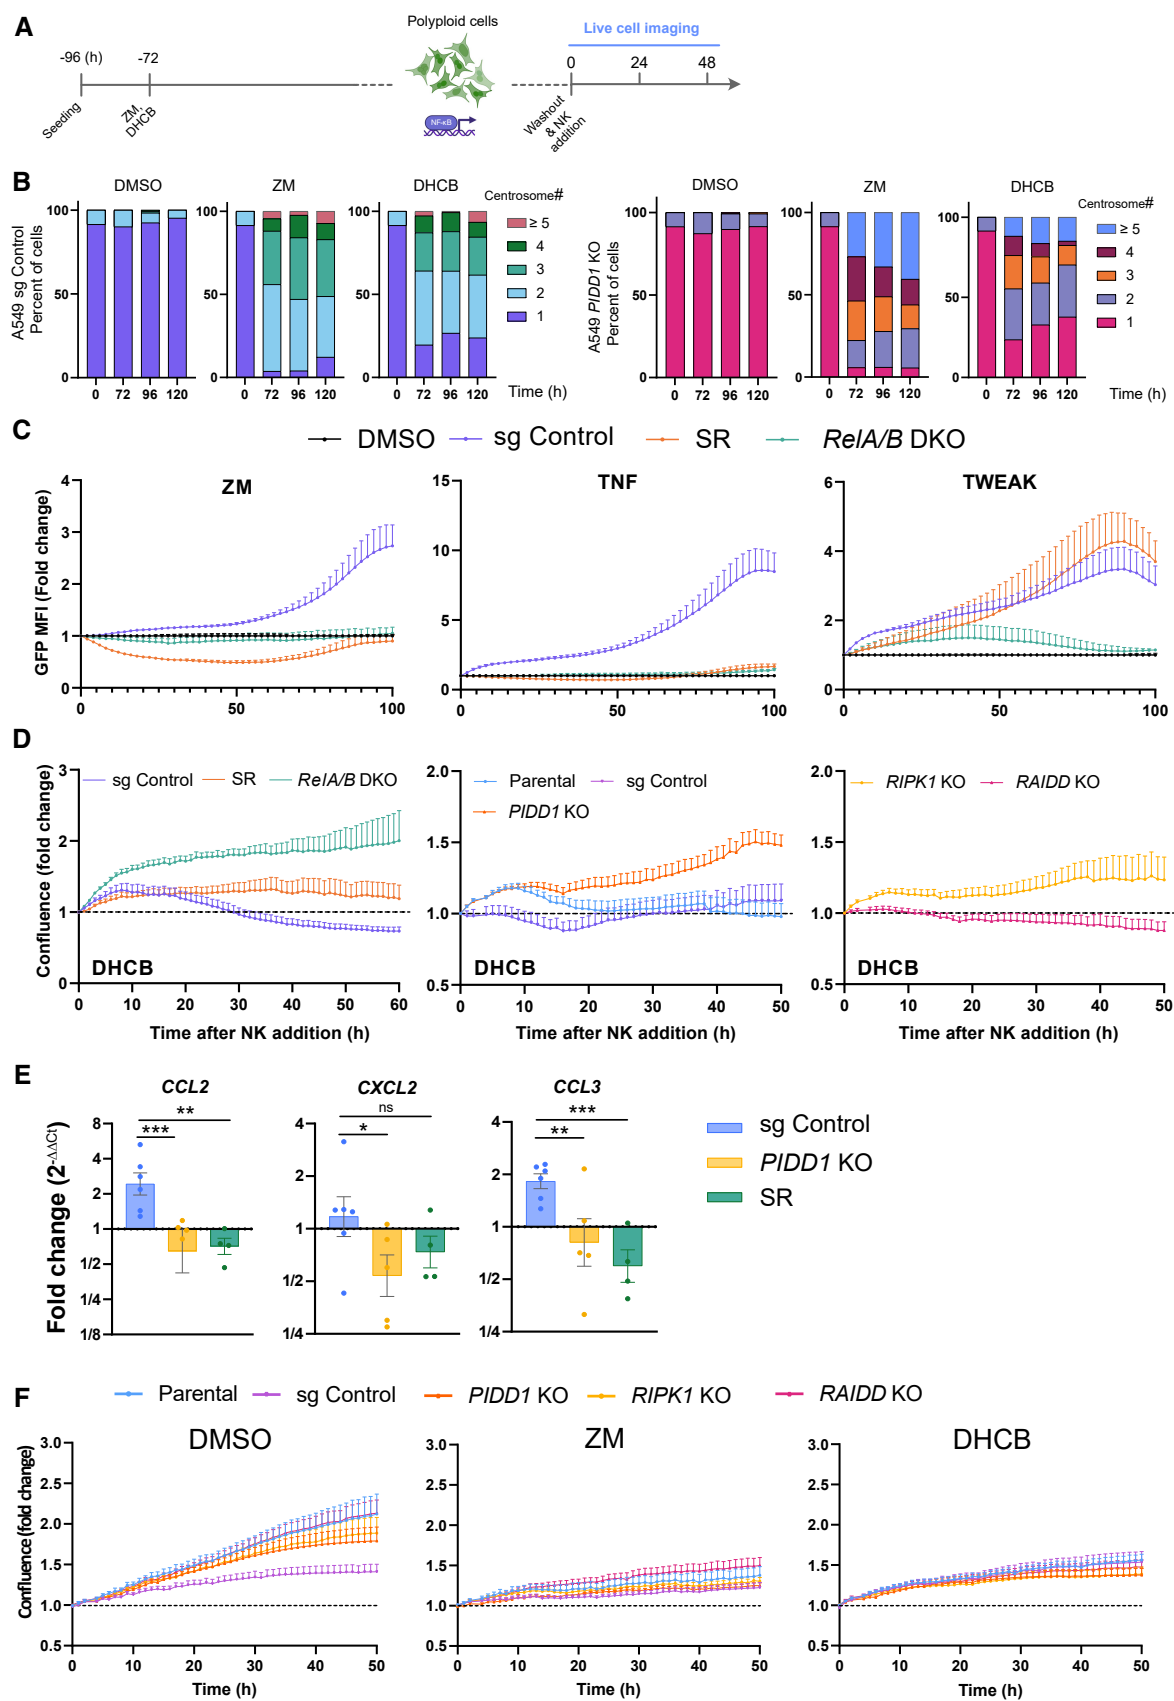

Figure EV5.
