# Supplementary material for: Extra centrosomes induce PIDD1‐mediated inflammation and immunosurveillance
Source: PubMed Central journal article supplement — EMBO J. 2023 Aug 2;42(20):e113510. doi: 10.15252/embj.2023113510 (PMC10577638; doi:10.15252/embj.2023113510), 2023-08-02
Supplement: EMBJ-42-e113510-s011.pdf [file EMBJ-42-e113510-s011.pdf]

**Appendix table of contents**

|                    | <b>Title</b>                                                     | <b>Page</b> |
|--------------------|------------------------------------------------------------------|-------------|
| Appendix Figure S1 | DNA content analysis of U2OS cells after drug-treatment          | 1           |
| Appendix Figure S2 | Evaluation of centrosome counts in A549-PLK4 and RPE1-PLK4 cells | 2           |
| Appendix Figure S3 | Assessment of DNA damage and mitotic timing                      | 3           |
| Appendix Table S1  | Cloning and CRIPSR primers                                       | 4           |

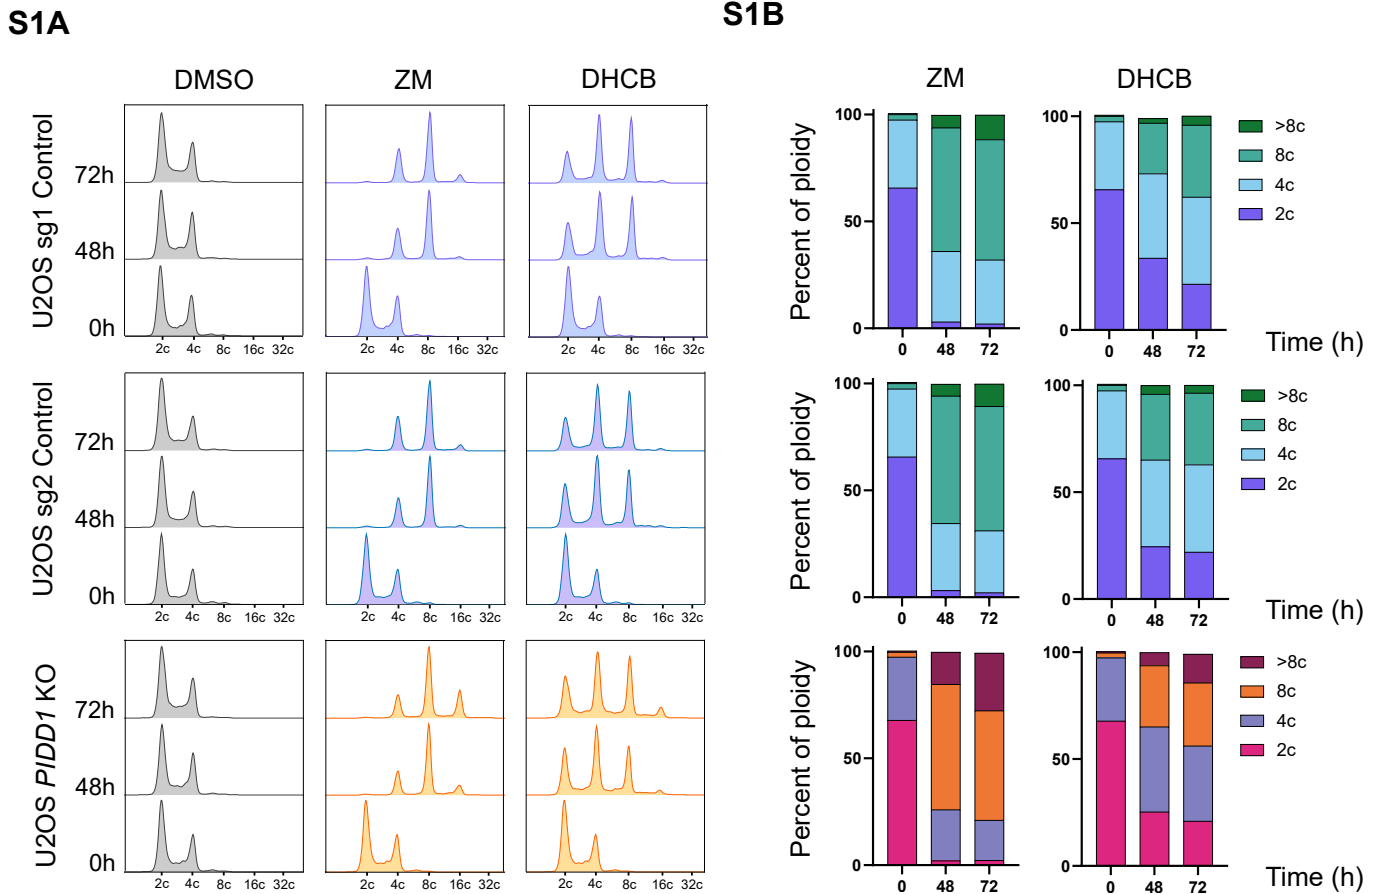

**Appendix Figure S1:** DNA content analysis of U2OS cells after drug-treatment

**A:** Representative histograms of U2OS cells of the indicated genotypes before or after treatment with ZM (2  $\mu$ M) or DHCB (4 $\mu$ M) for up to 48h. DNA content was analyzed after fixation and propidium iodide staining in a flow cytometer.

**B:** Quantification of different ploidy stages based on DNA profiles obtained in (A). Bars represent means of two independent experiments.

## S2A

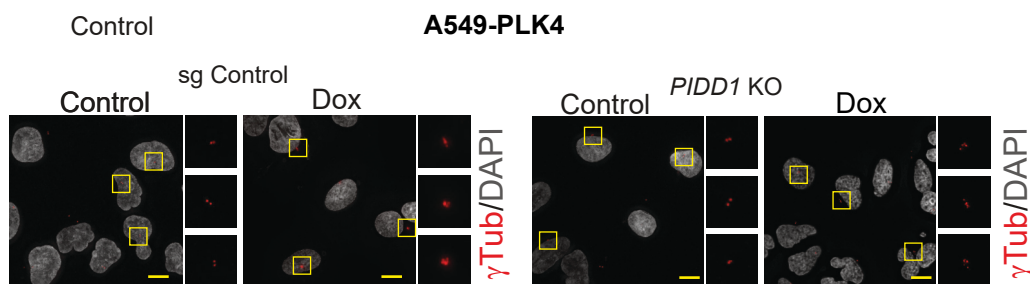

## S2B

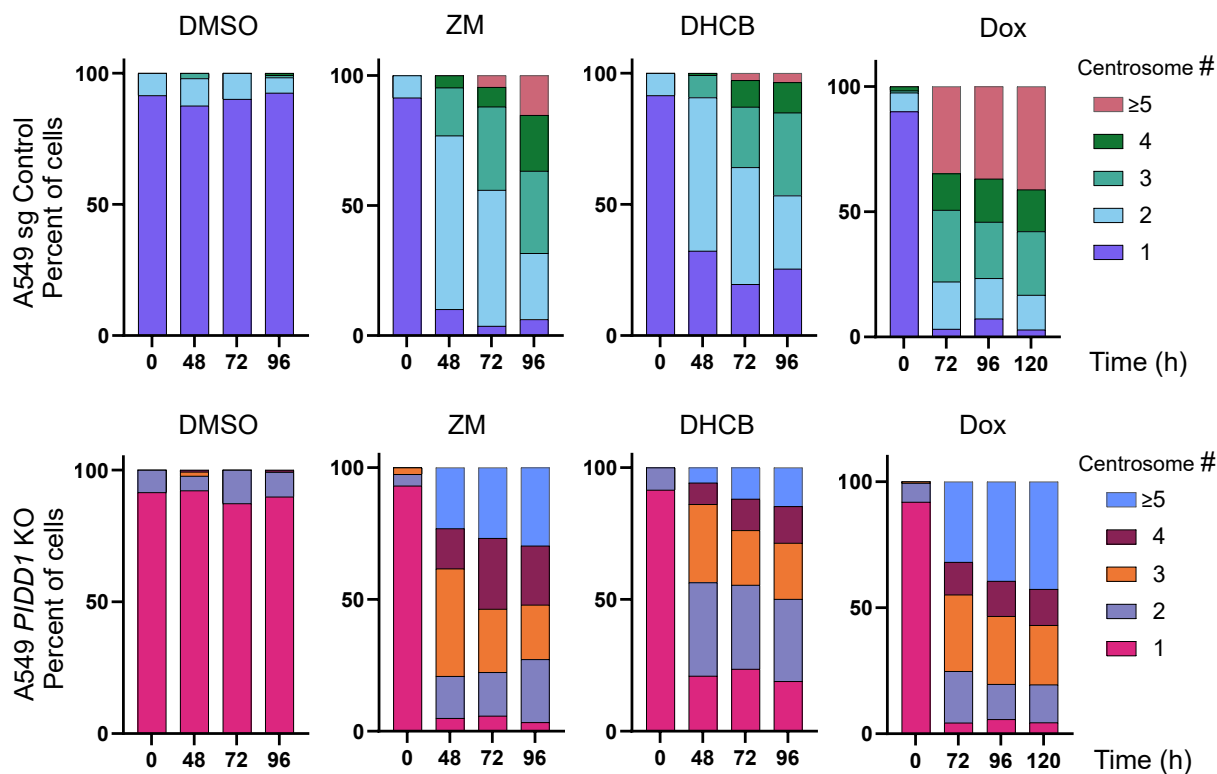

## S2C

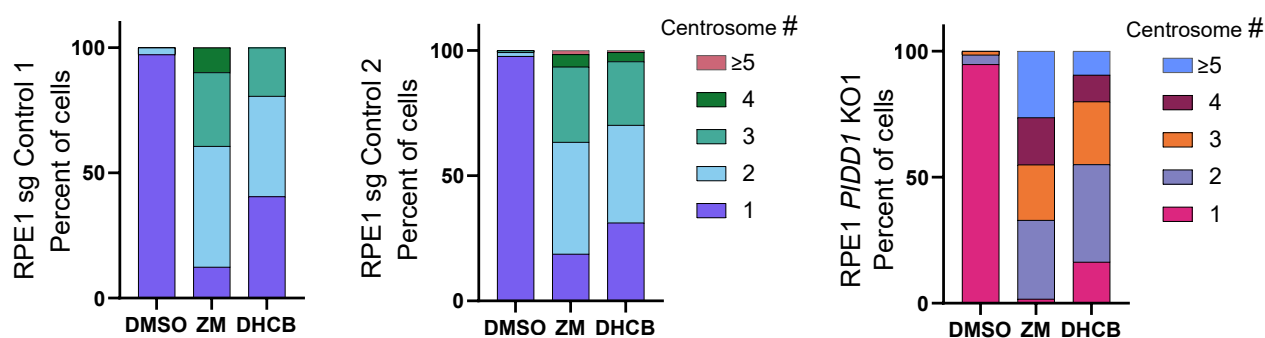

**Appendix Figure S2:** Evaluation of centrosome counts in A549-PLK4 and RPE1-PLK4 cells

**A:** Representative IF images of A549-PLK4 cells treated with DMSO (control) or Doxycycline (1 μg/ml) for 72h. Cells were fixed and stained with an antibody specific for  $\gamma$ -Tubulin and DAPI.

**B:** Evaluation of centriole counts after treatment with either solvent (DMSO), ZM (2 μM), DHCB (4 μM) or Doxycycline (1 μg/ml) for the indicated periods of time. A minimum of 50 cells per time point, condition and experiment were evaluated in a blinded manner. Bars represent means of two experiments.

**C:** RPE1 cells of the indicated genotypes were treated with ZM (2 μM) or DHCB (4 μM) for 72h, or left untreated. A minimum of 50 cells per time point, condition and experiment were evaluated in a blinded manner. Bars represent means of two experiments.

**S3A**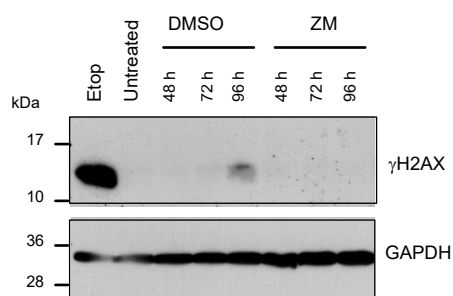**S3B**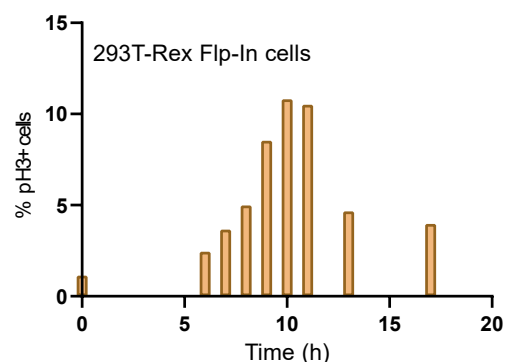**S3C**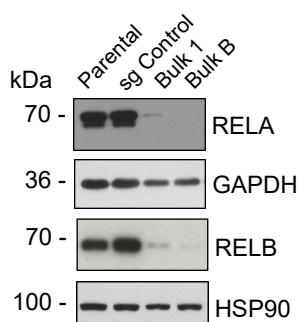**Appendix Figure S3: Assessment of DNA damage and mitotic timing**

**A:** U2OS-PLK4 cells were exposed to DMSO or ZM (2 μg/ml) for the indicated times. Etoposide treatment (10 μg/ml) for 24h was used as a positive control. Cell extracts were analyzed by western blot analysis using antibodies specific for γH2AX or GAPDH to control for protein loading.

**B:** 293T-Rex Flp-In cells were exposed to a single thymidine block and released into fresh medium. Cells were fixed at the indicated times after release and subjected to immunofluorescence analysis using an anti-phospho histone H3 specific antibody to evaluate the percentage of cells in mitosis over time.

**C:** Western blot analysis of A549 RELA/B double mutants and controls confirming lack of RELA and RELB expression.

Appendix Table S1: cloning and CRISPR primers

| primer name           | sequence                                                            |
|-----------------------|---------------------------------------------------------------------|
| PIDD_BamHI_Exon_DD_R  | CCCCTCGGACCCTCGGGATCCCGGCAGCTTGATGG                                 |
| F_hPIDD_G876S         | GCAGTCTTGGAGCTCAGCCGCCGAAGTACC                                      |
| R_hPIDD_G876S         | GGTACTTGCGG GGCTGAGCTCCAGACTGC                                      |
| F_hPIDD_R815W         | CTGGGGGTGTCCTACTGGAGGTGCAGCGCA                                      |
| R_hPIDD_R815W         | TGCGCTGCACCTCCCAGTAGGACACCCCCAG                                     |
| hPIDD_flag_Q863stop_F | GAGCAGAGTGACCGGGATTACAAGGATGACGATGACAAATAAGTCTTGGAGCTCGG            |
| hPIDD_flag_Q863stop_R | CCGAGCTCCAAGACTTATTTGTCATCGTCATCCTTGTAATCCCGGTCACTCTGCTC            |
| PIDD1_C_fwd1          | AACTTAAGCTTGCCACCATGTCCTGGTTCCTTGTGG                                |
| PIDD1_CC_fwd1         | AACTTAAGCTTGCCACCATGTCCTGGTACTGGCTCTGG                              |
| PIDD1_S588A_fw1       | CCAGGTCACACACTTCGCCTGGTACTGGC                                       |
| PIDD1_S588A_rev1      | GCCAGTACCAGGCGAAGTGTGTACCTGG                                        |
| PIDDC_S446A_F         | GGTGCCCACTTCGCCTGGTTCCTTGTGG                                        |
| PIDDC_S446A_R         | CCACAAGGAACCAGGCGAAGTGGGGCACC                                       |
| rtTA-plnd fw          | CTGGAATAATCATATGTGG                                                 |
| IRES-plnd rv          | GGTGGACCGTAAGCTTATC                                                 |
| HygR_plnduc21 fw      | GCTTACCGGTCCACCATGAAAAAGCCTGAACTCAC                                 |
| HygR_plnduc21 rv      | TCGCCGTCGGGCATGCTATTCTTTGCCCTCGGAC                                  |
| HA-PIDD1-N            | AACTTAAGCTTGCCACCATGTACCATACGACGTACCAGATTACGCTGAATTCGGATCCATGGCTGCA |

| Name                | gRNA sequence        |
|---------------------|----------------------|
| <i>PIDD1 1</i>      | GCCGATAGCGGATGGTGATG |
| <i>PIDD1 2</i>      | GGCCCGGCGCTGCCGTGAAG |
| <i>CASP 2</i>       | TGGTGAGCAACATATCCTCC |
| <i>RAIDD</i>        | CCAGCTCCAGGCGAAGTGAG |
| <i>RIPK1</i>        | TAGTCTGACGGATAAACACC |
| <i>NEMO</i>         | ACGCCGCCGTCCGAGAGACG |
| <i>SCLT1</i>        | GGGCCTCAGTCATATGTTCC |
| <i>RELA</i>         | ACTACGACCTGAATGCTGTG |
| <i>RELB</i>         | GAAAGCACAGGATCCATC   |
| <i>sg Control 1</i> | TATCTAATCGCGGAGTCGTA |
| <i>sg Control 2</i> | GCTGGGTGAGTCGATTATCC |
